# Supplementary material for: pH-Responsive i-motif Conjugated Hyaluronic Acid/Polyethylenimine Complexes for Drug Delivery Systems
Source: MDPI journal article supplement (doi:10.3390/pharmaceutics11050247), 2019-05-27
Supplement: s1 [file s1]

# Supplementary Materials: pH-Responsive i-motif Conjugated Hyaluronic Acid/Polyethylenimine Complexes for Drug Delivery Systems

Gyeong Jin Lee and Tae-il Kim

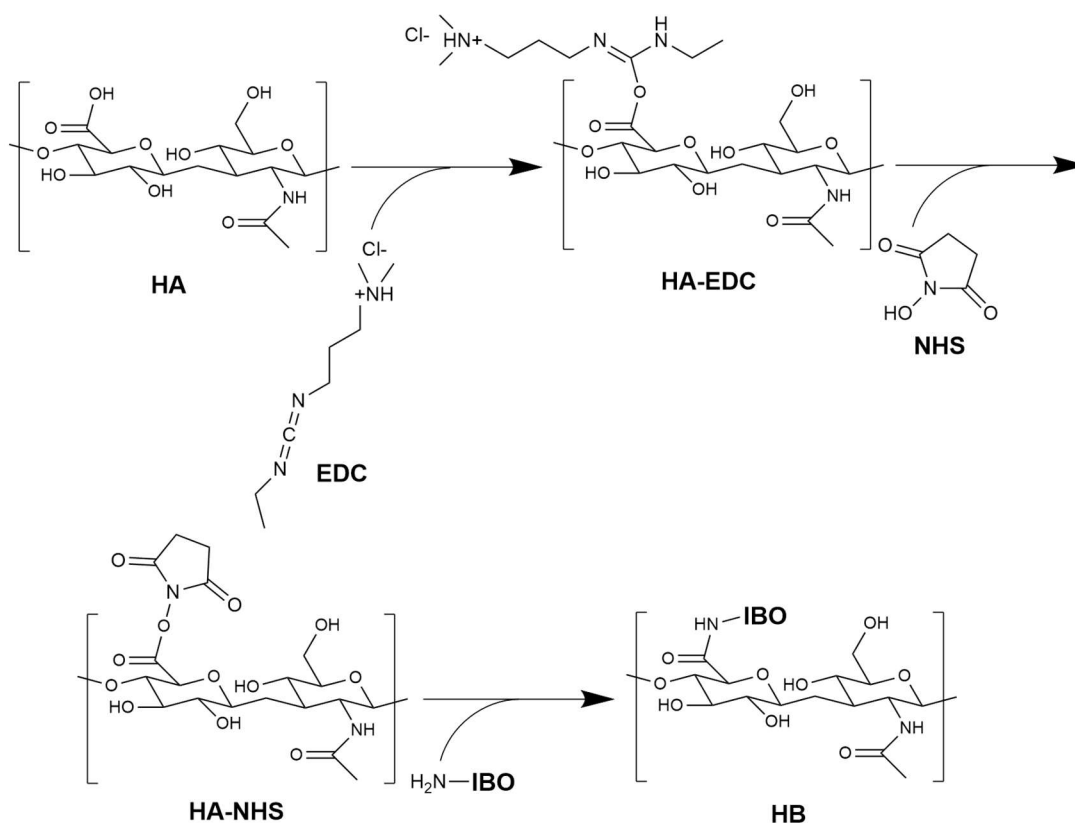

**Figure S1.** Scheme for the synthesis of HA-IBO conjugate (HB) with EDC/NHS chemistry. Carboxyl acid groups of HA are activated by EDC via forming HA-EDC (O-acyl urea intermediate). O-acyl urea of HA-EDC is replaced with NHS via nucleophilic attack of hydroxyl group of NHS to activated carboxyl groups of HA, forming HA-NHS ester. Finally, primary amine of IBO reacts with HA-NHS, conjugating IBO to HA (synthesis of HB) via amide bond linkages.

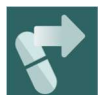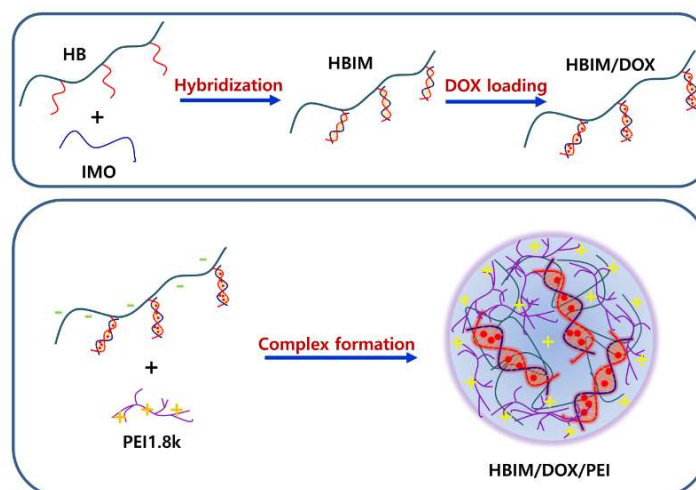

**Figure S2.** Scheme for the formation of HBIM structure via hybridization of HB and IMO, and the formation of HBIM/PEI complexes via electrostatic interaction of negatively charged HBIM and positively charged PEI1.8k. DOX molecules (red dots) can be intercalated into hybridized base planes of HBIM.

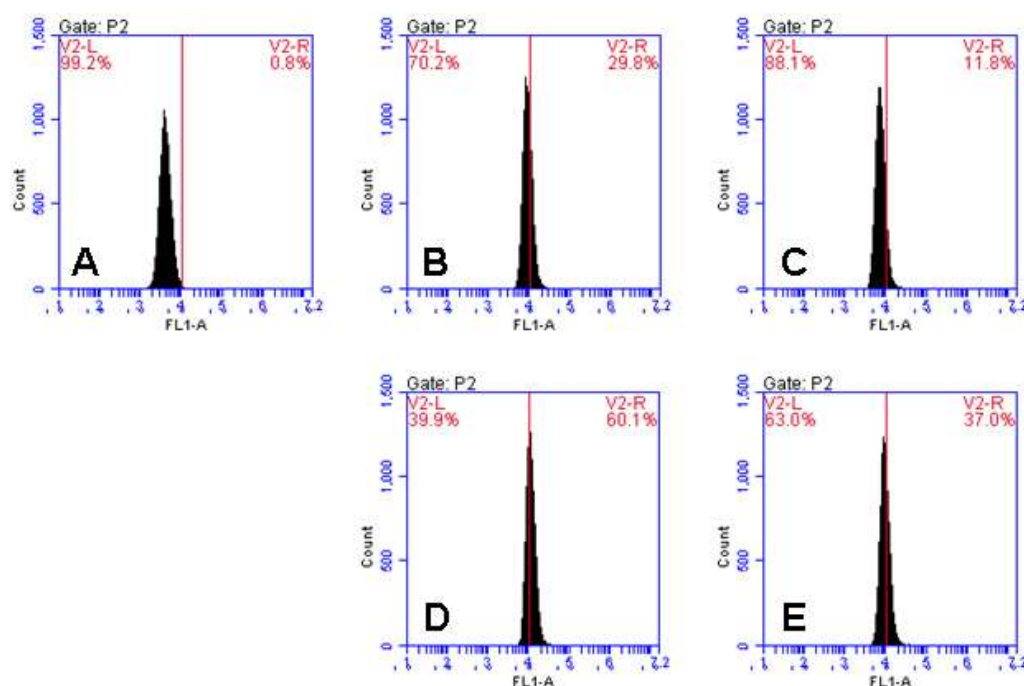

**Figure S3.** Cellular uptake efficiency of HBIM/DOX and HBIM/DOX/PEI complexes in HeLa cells. Cell only (A), HBIM/DOX (B), HBIM/DOX in HA condition (C), HBIM/DOX/PEI (D), and HBIM/DOX/PEI in HA condition (E). Cells were seeded at a density of  $3 \times 10^5$  cells/well in a 6-well plate and grown to reach 70–80% confluency. Prior to sample treatment, cells were pretreated with DMEM or DMEM containing HA solution (20 mg/mL) for 1 h. Then, HBIM/DOX or HBIM/DOX/PEI complexes (DOX = 2  $\mu$ g/mL) were treated to the cells for 3 h. After removal of media, the cells were washed with ice-cold DPBS twice and trypsinized. The detached cells were suspended in 2 mL DPBS and re-suspended after centrifuge. The cellular uptake was determined by measuring the fluorescence of loaded DOX by BD Accuri C6 flow cytometer (Becton Dickinson, Piscataway, NJ, USA) at a minimum of  $1 \times 10^4$  cells gated per sample. Analysis was performed by BD Accuri C6 software (Becton Dickinson, Piscataway, NJ, USA).
